# Supplementary material for: CircMIB2 therapy can effectively treat pathogenic infection by encoding a novel protein
Source: PubMed Central journal article supplement (PMC10471593; doi:10.1038/s41419-023-06105-3), 2023-08-31

**Figure 5K**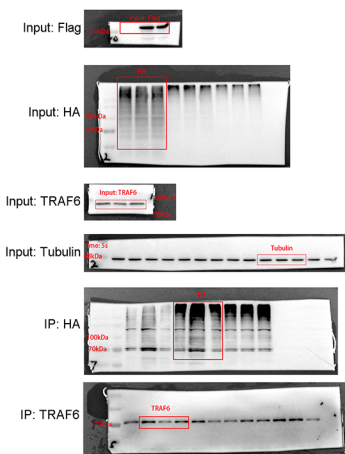**Figure 5L**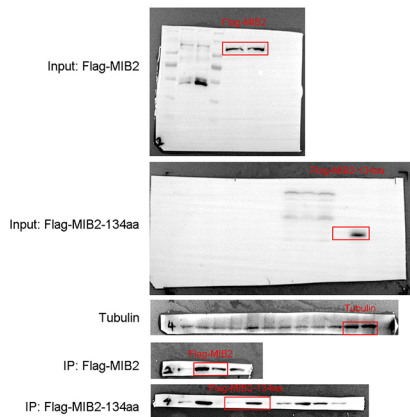**Figure 5M**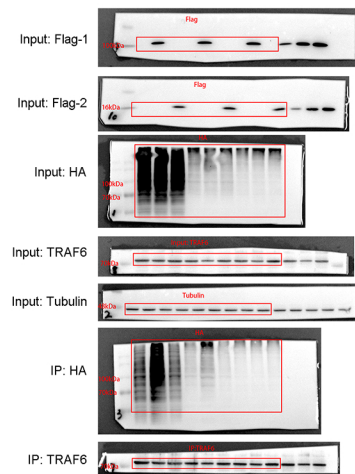**Figure 6A**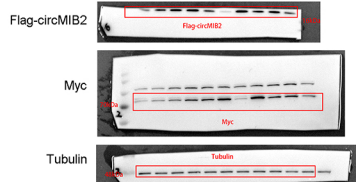**Figure 6B**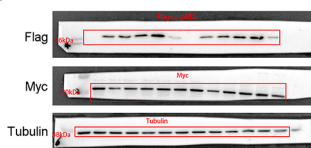**Figure 6C**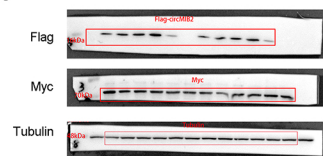**Figure 6D**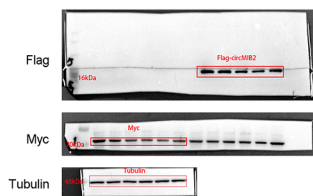**Figure 6H**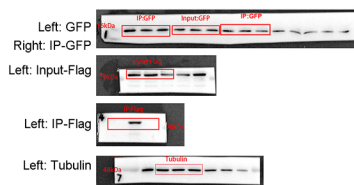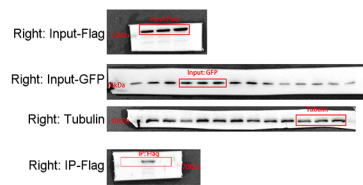**Figure 7A**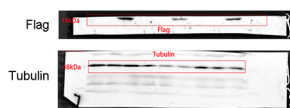**Figure 7D**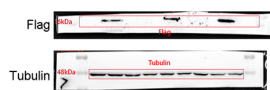**Figure S2A**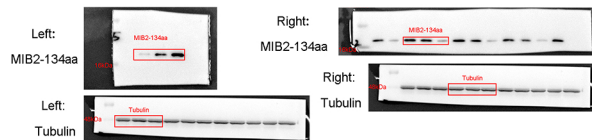**Figure S2C**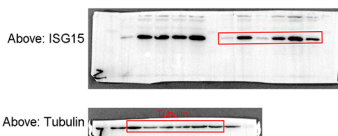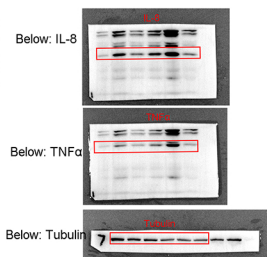**Figure S2D**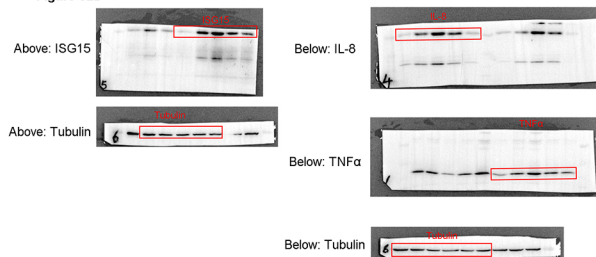

Supplement: 41419_2023_6105_MOESM6_ESM.pdf [file 41419_2023_6105_MOESM6_ESM.pdf]
