# Supplementary material for: CircMIB2 therapy can effectively treat pathogenic infection by encoding a novel protein
Source: PubMed Central journal article supplement (PMC10471593; doi:10.1038/s41419-023-06105-3), 2023-08-31

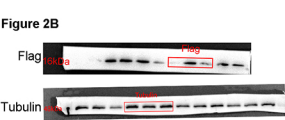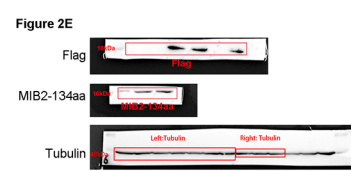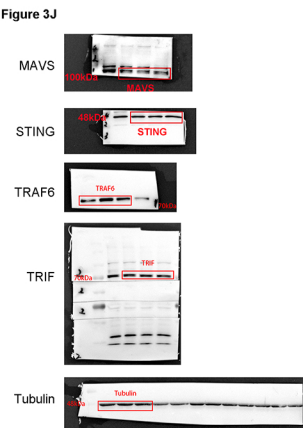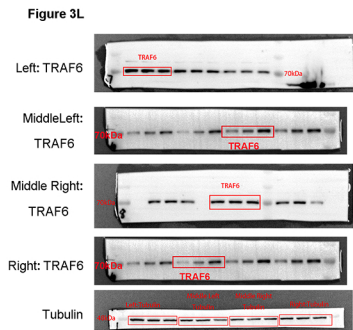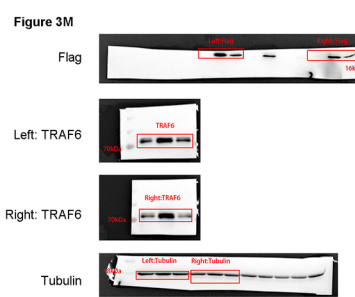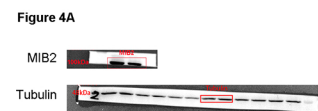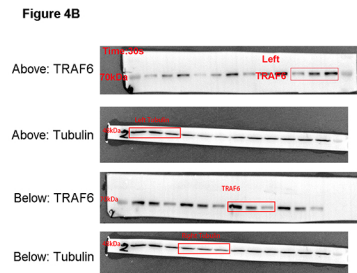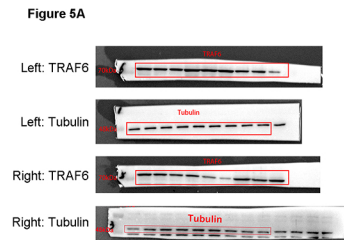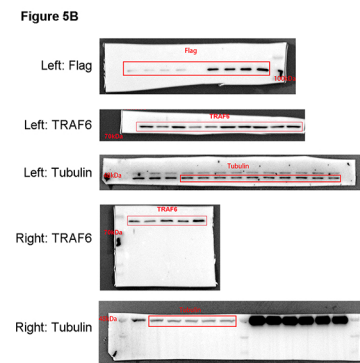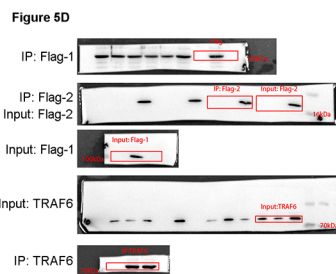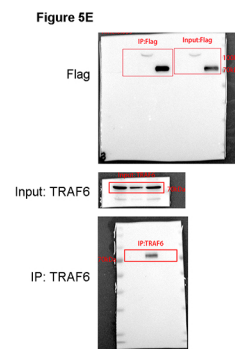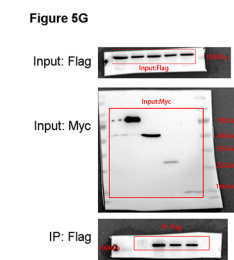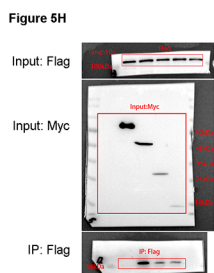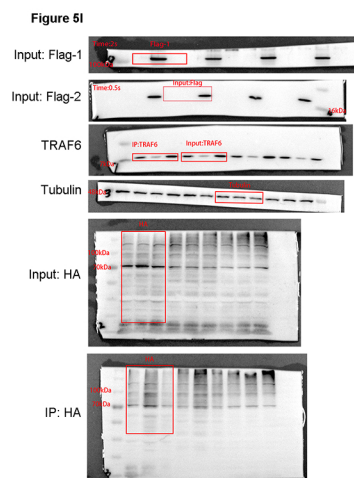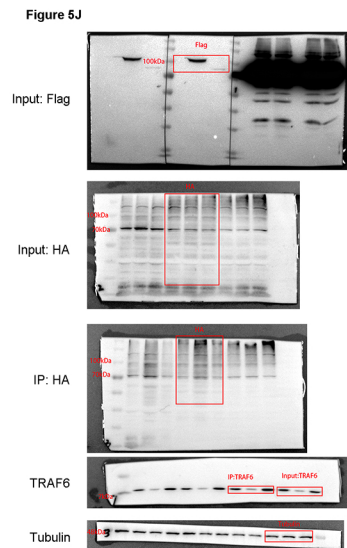

Supplement: 41419_2023_6105_MOESM5_ESM.pdf [file 41419_2023_6105_MOESM5_ESM.pdf]
